# Supplementary material
Source: ML conference proceedings conference paper supplement (https://proceedings.mlr.press/v139/zweig21a.html)
Supplement: Supplementary file 1 [file zweig21a-supp.zip]

Archive with 202 entries (120 files):
- supp/
- supp/.DS_Store
- __MACOSX/
- __MACOSX/supp/
- __MACOSX/supp/._.DS_Store
- supp/appendix.pdf
- __MACOSX/supp/._appendix.pdf
- supp/functional_symmetric_supp/
- supp/functional_symmetric_supp/main.ipynb
- supp/functional_symmetric_supp/.DS_Store
- __MACOSX/supp/functional_symmetric_supp/
- __MACOSX/supp/functional_symmetric_supp/._.DS_Store
- supp/functional_symmetric_supp/robust_main.py
- __MACOSX/supp/functional_symmetric_supp/._robust_main.py
- supp/functional_symmetric_supp/cloud_main.py
- __MACOSX/supp/functional_symmetric_supp/._cloud_main.py
- supp/functional_symmetric_supp/model.py
- __MACOSX/supp/functional_symmetric_supp/._model.py
- supp/functional_symmetric_supp/objectives.py
- __MACOSX/supp/functional_symmetric_supp/._objectives.py
- supp/functional_symmetric_supp/train.py
- __MACOSX/supp/functional_symmetric_supp/._train.py
- supp/functional_symmetric_supp/sample.py
- __MACOSX/supp/functional_symmetric_supp/._sample.py
- supp/functional_symmetric_supp/evaluate.py
- __MACOSX/supp/functional_symmetric_supp/._evaluate.py
- supp/functional_symmetric_supp/.ipynb_checkpoints/
- supp/functional_symmetric_supp/.ipynb_checkpoints/symmetric_applied-checkpoint.ipynb
- supp/functional_symmetric_supp/.ipynb_checkpoints/deep_symmetric_net-checkpoint.ipynb
- supp/functional_symmetric_supp/.ipynb_checkpoints/symmetric_applied-point-cloud-checkpoint.ipynb
- supp/functional_symmetric_supp/.ipynb_checkpoints/explorative_symmetric-checkpoint.ipynb
- supp/functional_symmetric_supp/.ipynb_checkpoints/deep_symmetric_net_random_neurons_high_dim (2)-checkpoint.ipynb
- supp/functional_symmetric_supp/.ipynb_checkpoints/deep_symmetric_net_messy-checkpoint.ipynb
- supp/functional_symmetric_supp/.git/
- supp/functional_symmetric_supp/.git/ORIG_HEAD
- supp/functional_symmetric_supp/.git/config
- supp/functional_symmetric_supp/.git/objects/
- supp/functional_symmetric_supp/.git/objects/0d/
- supp/functional_symmetric_supp/.git/objects/0d/fda71a760a6bee8c35a0199f56de3f8b8c33c2
- supp/functional_symmetric_supp/.git/objects/95/
- supp/functional_symmetric_supp/.git/objects/95/601bb7c3f4ca98ff90433c17ef46b1794bd99d
- supp/functional_symmetric_supp/.git/objects/6f/
- supp/functional_symmetric_supp/.git/objects/6f/cb39ba42069d2ef30f098728dead876dfe31bf
- supp/functional_symmetric_supp/.git/objects/6a/
- supp/functional_symmetric_supp/.git/objects/6a/6f107c30254720b2ee22c056bb7418356a6950
- supp/functional_symmetric_supp/.git/objects/35/
- supp/functional_symmetric_supp/.git/objects/35/ad1ac5233851fad375ab100ee487d06f407ccb
- supp/functional_symmetric_supp/.git/objects/69/
- supp/functional_symmetric_supp/.git/objects/69/81e0962b051bb9f4287bb42db8389cb0ad1d17
- supp/functional_symmetric_supp/.git/objects/51/
- supp/functional_symmetric_supp/.git/objects/51/8079ce3453426b8a83ca7b028445af312c3780
- supp/functional_symmetric_supp/.git/objects/5a/
- supp/functional_symmetric_supp/.git/objects/5a/8872d22c65792c1597e8a60741b6bba22cae2b
- supp/functional_symmetric_supp/.git/objects/5f/
- supp/functional_symmetric_supp/.git/objects/5f/1db08756c396168f0dd788ac1b43e88e0a94fa
- supp/functional_symmetric_supp/.git/objects/d9/
- supp/functional_symmetric_supp/.git/objects/d9/7cbb8615e262bfe4e768022e4a15763e45c10d
- supp/functional_symmetric_supp/.git/objects/bb/
- supp/functional_symmetric_supp/.git/objects/bb/a9c13d16b88b18002f524f6cbefbfc96ced9a7
- supp/functional_symmetric_supp/.git/objects/bb/6f660bf4a6e80cfbe3ce0255b550c429787b9d
- supp/functional_symmetric_supp/.git/objects/d0/
- supp/functional_symmetric_supp/.git/objects/d0/ddf27a41c4205e7dd1f6ccf0293ef60892660c
- supp/functional_symmetric_supp/.git/objects/be/
- supp/functional_symmetric_supp/.git/objects/be/333cb9ff8041e0085ce7261b58d609f4e0ae9e
- supp/functional_symmetric_supp/.git/objects/b3/
- supp/functional_symmetric_supp/.git/objects/b3/66a43fa1b58a639c5570c379275d3a305b25e9
- supp/functional_symmetric_supp/.git/objects/da/
- supp/functional_symmetric_supp/.git/objects/da/c9e4ceb572955979b3a2b2799d49e8867fb415
- supp/functional_symmetric_supp/.git/objects/ae/
- supp/functional_symmetric_supp/.git/objects/ae/b1ae37f843ccf0a2ba6675cd80a5824c9b188e
- supp/functional_symmetric_supp/.git/objects/eb/
- supp/functional_symmetric_supp/.git/objects/eb/1cef12ca546c7d85b9df448339269157e533e9
- supp/functional_symmetric_supp/.git/objects/c7/
- supp/functional_symmetric_supp/.git/objects/c7/2860ea8caea13a0079bcf1deeb02804d6d1e8d
- supp/functional_symmetric_supp/.git/objects/f2/
- supp/functional_symmetric_supp/.git/objects/f2/675da29dfc07786bc072ba3c2bb2e9fbadf842
- supp/functional_symmetric_supp/.git/objects/f5/
- supp/functional_symmetric_supp/.git/objects/f5/a5e4ce25d20942337f8ff77f7c22e8ce69afc7
- supp/functional_symmetric_supp/.git/objects/ca/
- supp/functional_symmetric_supp/.git/objects/ca/430aa2e579f0f2b20b4675077343f1f582b6f1
- supp/functional_symmetric_supp/.git/objects/ed/
- supp/functional_symmetric_supp/.git/objects/ed/3dfd9659c88b0fa52b9be204125ac7039f1399
- supp/functional_symmetric_supp/.git/objects/c6/
- supp/functional_symmetric_supp/.git/objects/c6/58ed374a3391d6fe0dd8d0f1a918cf49873f9b
- supp/functional_symmetric_supp/.git/objects/4e/
- supp/functional_symmetric_supp/.git/objects/4e/76d0faae2f75b5dce92e0de45b90e8e247d890
- supp/functional_symmetric_supp/.git/objects/4e/f96b093a4c0b8afd566692f89d2ecba9a7dc07
- supp/functional_symmetric_supp/.git/objects/20/
- supp/functional_symmetric_supp/.git/objects/20/146d0ef80a06c3632334c92953399b70dacf2f
- supp/functional_symmetric_supp/.git/objects/4b/
- supp/functional_symmetric_supp/.git/objects/4b/e56b9067bd03a5dbb3ae2fa41123449d09e306
- supp/functional_symmetric_supp/.git/objects/pack/
- supp/functional_symmetric_supp/.git/objects/73/
- supp/functional_symmetric_supp/.git/objects/73/f7f860ef79c6e50c5dc0c7dd224496db5c8414
- supp/functional_symmetric_supp/.git/objects/80/
- supp/functional_symmetric_supp/.git/objects/80/cf63dcbd1e60a4488929d62f7a9762e2a4dafd
- supp/functional_symmetric_supp/.git/objects/74/
- supp/functional_symmetric_supp/.git/objects/74/a758ceda65f6fb0f9cc5a128c749591e724094
- supp/functional_symmetric_supp/.git/objects/7b/
- supp/functional_symmetric_supp/.git/objects/7b/2c960f9f9ad0b301262eb457f12ee39b9e60c7
- supp/functional_symmetric_supp/.git/objects/21/
- supp/functional_symmetric_supp/.git/objects/21/29272f0bf1dc727ef7996a4934b8a1e1381765
- supp/functional_symmetric_supp/.git/objects/86/
- supp/functional_symmetric_supp/.git/objects/86/498432e28afe357fd78509b840107adb59ef4b
- supp/functional_symmetric_supp/.git/objects/9f/
- supp/functional_symmetric_supp/.git/objects/9f/2820551c07491a76c3488c4a4f1ac42b2d791b
- supp/functional_symmetric_supp/.git/objects/9f/0c8eb2b71f0234c90343a25b2b5223c7bc1a8e
- supp/functional_symmetric_supp/.git/objects/00/
- supp/functional_symmetric_supp/.git/objects/00/292180be3a1bb1c81045411b11787800c273a0
- supp/functional_symmetric_supp/.git/objects/info/
- supp/functional_symmetric_supp/.git/objects/3f/
- supp/functional_symmetric_supp/.git/objects/3f/d570a5c3d45973ecc04ab2260b14b0b5f87e2a
- supp/functional_symmetric_supp/.git/objects/6d/
- supp/functional_symmetric_supp/.git/objects/6d/5617552b333dcf352e742c6bf22cb1912c8f7f
- supp/functional_symmetric_supp/.git/objects/6c/
- supp/functional_symmetric_supp/.git/objects/6c/54c53325969dfb3ad3aeadc073eb1bf8761f2d
- supp/functional_symmetric_supp/.git/objects/6c/600127a57a8faf16f89e2c5f96ee563c59b3f2
- supp/functional_symmetric_supp/.git/objects/0a/
- supp/functional_symmetric_supp/.git/objects/0a/3964dd4f9d2e7b66a04c5b024d2625bf207375
- supp/functional_symmetric_supp/.git/objects/a7/
- supp/functional_symmetric_supp/.git/objects/a7/bb6cc2e0801529a58a56820314929abe26c2ac
- supp/functional_symmetric_supp/.git/objects/b8/
- supp/functional_symmetric_supp/.git/objects/b8/110450193da26c2cdae87215ac81e4fe3be996
- supp/functional_symmetric_supp/.git/objects/dc/
- supp/functional_symmetric_supp/.git/objects/dc/75ecd53990580b81b5e555ffe5e19e785e84ea
- supp/functional_symmetric_supp/.git/objects/a9/
- supp/functional_symmetric_supp/.git/objects/a9/5d222ee3cad2186b009b34a68cee63a91fda49
- supp/functional_symmetric_supp/.git/objects/d2/
- supp/functional_symmetric_supp/.git/objects/d2/4d35e9765d7f67a2ebc0f7619944bd55537e49
- supp/functional_symmetric_supp/.git/objects/a8/
- supp/functional_symmetric_supp/.git/objects/a8/b8670fbe7615e8ce22c219c931886d9870aae5
- supp/functional_symmetric_supp/.git/objects/b9/
- supp/functional_symmetric_supp/.git/objects/b9/eb669c0e4365f1870eba1e59043c3676ced49a
- supp/functional_symmetric_supp/.git/objects/c3/
- supp/functional_symmetric_supp/.git/objects/c3/083d1772ab8124f7c18738cbba90dca84b9341
- supp/functional_symmetric_supp/.git/objects/e1/
- supp/functional_symmetric_supp/.git/objects/e1/b1a99d64825ef647519d7d98d2f35d063da78b
- supp/functional_symmetric_supp/.git/objects/e6/
- supp/functional_symmetric_supp/.git/objects/e6/ab1a4b76df5c0d493b128f24a33b4bf2ef8ff2
- supp/functional_symmetric_supp/.git/objects/f9/
- supp/functional_symmetric_supp/.git/objects/f9/de1c5999b59fdc1e8d3c0a1e3acc599ac9e813
- supp/functional_symmetric_supp/.git/objects/f0/
- supp/functional_symmetric_supp/.git/objects/f0/77620ef641f86dfe8e832d24db59fe985bec4d
- supp/functional_symmetric_supp/.git/objects/f0/eeb715c9e6af6da329158e485b014ab8cc8ad6
- supp/functional_symmetric_supp/.git/objects/e8/
- supp/functional_symmetric_supp/.git/objects/e8/22beb9811279491edfd1c6965bd677eb98a110
- supp/functional_symmetric_supp/.git/objects/ce/
- supp/functional_symmetric_supp/.git/objects/ce/5f4360b852a1f0c4162e8297043b118827aa5a
- supp/functional_symmetric_supp/.git/objects/2d/
- supp/functional_symmetric_supp/.git/objects/2d/9a322a4f68b5a2fecdbca15c459ed5a75996d6
- supp/functional_symmetric_supp/.git/objects/48/
- supp/functional_symmetric_supp/.git/objects/48/b7365aa82107a0781cd3bdc770bbe03a5ed473
- supp/functional_symmetric_supp/.git/objects/4f/
- supp/functional_symmetric_supp/.git/objects/4f/1a2d4d6a4c36b2368689b43fed6bd17fe01d12
- supp/functional_symmetric_supp/.git/objects/2e/
- supp/functional_symmetric_supp/.git/objects/2e/d31c324cf1cb84e2231bdbed4dc6f3a03c8b14
- supp/functional_symmetric_supp/.git/objects/47/
- supp/functional_symmetric_supp/.git/objects/47/5be63cf02b7e54a71482121d104d914e752811
- supp/functional_symmetric_supp/.git/objects/7f/
- supp/functional_symmetric_supp/.git/objects/7f/163501d876c4c09c5330e66dfa3e392551742a
- supp/functional_symmetric_supp/.git/objects/7f/ea631114c9b7c183efbcb326a1f8d3b4204f7b
- supp/functional_symmetric_supp/.git/objects/7f/f50d7af1f1ac5dea3f85573d8a1fd47d2ef673
- supp/functional_symmetric_supp/.git/objects/7a/
- supp/functional_symmetric_supp/.git/objects/7a/b856ec6e60d132e258611a27cc99caea2bf9fb
- supp/functional_symmetric_supp/.git/objects/7a/69d22738c09e60dcd845ec22a876815f8fac0d
- supp/functional_symmetric_supp/.git/objects/25/
- supp/functional_symmetric_supp/.git/objects/25/7ba0dc1dc81a790adbb85774826c8bc30d66ee
- supp/functional_symmetric_supp/.git/HEAD
- supp/functional_symmetric_supp/.git/info/
- supp/functional_symmetric_supp/.git/info/exclude
- supp/functional_symmetric_supp/.git/logs/
- supp/functional_symmetric_supp/.git/logs/HEAD
- supp/functional_symmetric_supp/.git/logs/refs/
- supp/functional_symmetric_supp/.git/logs/refs/heads/
- supp/functional_symmetric_supp/.git/logs/refs/heads/master
- supp/functional_symmetric_supp/.git/logs/refs/remotes/
- supp/functional_symmetric_supp/.git/logs/refs/remotes/origin/
- supp/functional_symmetric_supp/.git/logs/refs/remotes/origin/master
- supp/functional_symmetric_supp/.git/logs/refs/stash
- supp/functional_symmetric_supp/.git/description
- supp/functional_symmetric_supp/.git/hooks/
- supp/functional_symmetric_supp/.git/hooks/commit-msg.sample
- supp/functional_symmetric_supp/.git/hooks/pre-rebase.sample
- supp/functional_symmetric_supp/.git/hooks/pre-commit.sample
- supp/functional_symmetric_supp/.git/hooks/applypatch-msg.sample
- supp/functional_symmetric_supp/.git/hooks/pre-receive.sample
- supp/functional_symmetric_supp/.git/hooks/prepare-commit-msg.sample
- supp/functional_symmetric_supp/.git/hooks/post-update.sample
- supp/functional_symmetric_supp/.git/hooks/pre-applypatch.sample
- supp/functional_symmetric_supp/.git/hooks/pre-push.sample
- supp/functional_symmetric_supp/.git/hooks/update.sample
- supp/functional_symmetric_supp/.git/refs/
- supp/functional_symmetric_supp/.git/refs/heads/
- supp/functional_symmetric_supp/.git/refs/heads/master
- supp/functional_symmetric_supp/.git/refs/tags/
- supp/functional_symmetric_supp/.git/refs/remotes/
- supp/functional_symmetric_supp/.git/refs/remotes/origin/
- supp/functional_symmetric_supp/.git/refs/remotes/origin/master
- supp/functional_symmetric_supp/.git/refs/stash
- supp/functional_symmetric_supp/.git/index
- supp/functional_symmetric_supp/.git/COMMIT_EDITMSG
- supp/functional_symmetric_supp/.git/FETCH_HEAD
